# Supplementary material
Source: MDPI journal article supplement (https://www.mdpi.com/2673-4591/10/1/50)
Supplement: s1 [file s1]

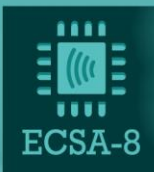

The 8th International Electronic Conference on  
Sensors and Applications

01-15 NOVEMBER 2021 | ONLINE

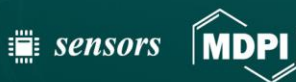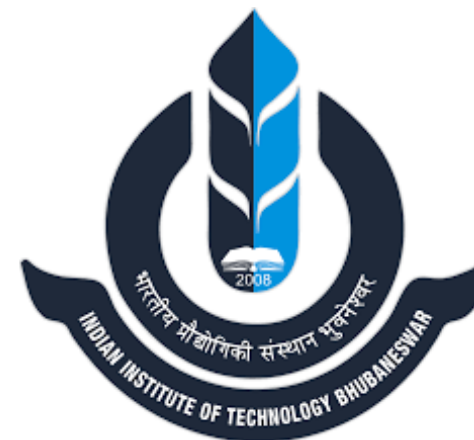

## Surface-mounted smart PZT sensors for monitoring damage using EMI-based multi-sensing technique

**Aditya Parpe** and Jothi Saravanan Thiyagarajan

School of Infrastructure,

Indian Institute of Technology Bhubaneswar, India

Mail: [ap35@iitbbs.ac.in](mailto:ap35@iitbbs.ac.in)

# Introduction

- Need of **structural health monitoring** to avoid the sudden failure & overcome maintenance problems.
- **Lead Zirconate Titanate (PZT)** act as **actuator** as well as **sensor**.
- “**Electro-Mechanical Impedance Technique**”: Non-destructive technique.
- In this research, the proposal of the multi-sensing technique on the surface-mounted PZT sensors is offered.
- The effective methodologies **to monitor the damage** in the concrete structures, using **multiple surface-mounted PZT sensors**, are presented.
- This study considers the important aspects of SHM, **damage detection** and **localization**.

# Introduction

1. Methodology for damage detection-
  - ✓ The **sensors** are **harmonically excited** in the high-frequency range.
  - ✓ **Obtaining conductance signatures** at different states and **comparing** them.
  - ✓ Evaluating **statistical metrics** (namely root mean square deviation and correlation coefficient) for better understanding of **trend** of signatures.

# Introduction

## 2. Methodology for damage localization-

- ✓ The **group of sensors** are assumed to be in **parallel connection**.
- ✓ **MISO mode** is preferred to obtain **multiplexed signatures** of particular combination.
- ✓ Three combinations: SSU2-3, SSU1-3 and SSU1-2-3.
- ✓ Evaluating **dynamic metrics** (namely moving RMSD and moving CC) for localization.
- ✓ The magnitude of moving RMSD and moving CC.

# Numerical investigation

Smart sensing units (SSUs)

- Steel plate + adhesive layer + PZT patch = SSU
- PZT patch: PIC 151
- SSUs are harmonically excited [0-450 kHz]
- Distinct resonant frequencies of SSUs.

| SSU                      | 1    | 2   | 3   |
|--------------------------|------|-----|-----|
| Thickness (mm)           | 0.75 | 1.5 | 3   |
| Resonant frequency (kHz) | 335  | 350 | 355 |

# Numerical investigation

Concrete beam with multiple surface-mounted SSUs:  
Damage monitoring

- Damage: crack of length 20 mm.
- External loading: load impactor
  - ✓ 10 kN
  - ✓ 30 kN

| SSU No.                           | 1   | 2   | 3   |
|-----------------------------------|-----|-----|-----|
| Distance from impactor (mm)       | 310 | 110 | 250 |
| Distance from crack location (mm) | 70  | 120 | 480 |

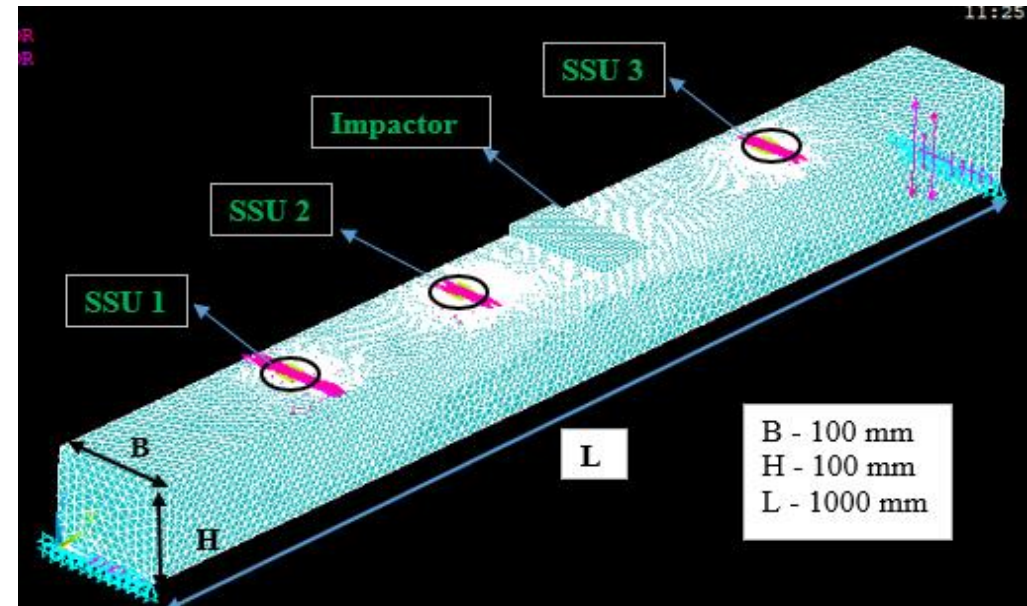

- Conductance signatures are obtained from each SSUs at different states.

# Results

## Damage detection study

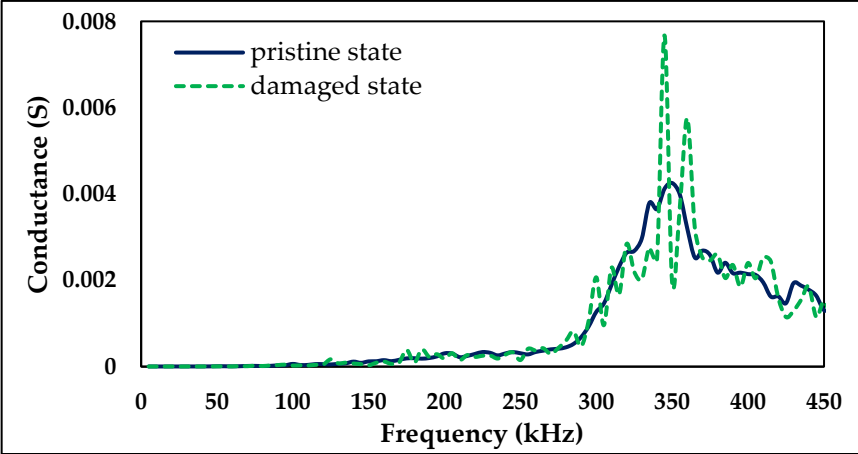

(a)

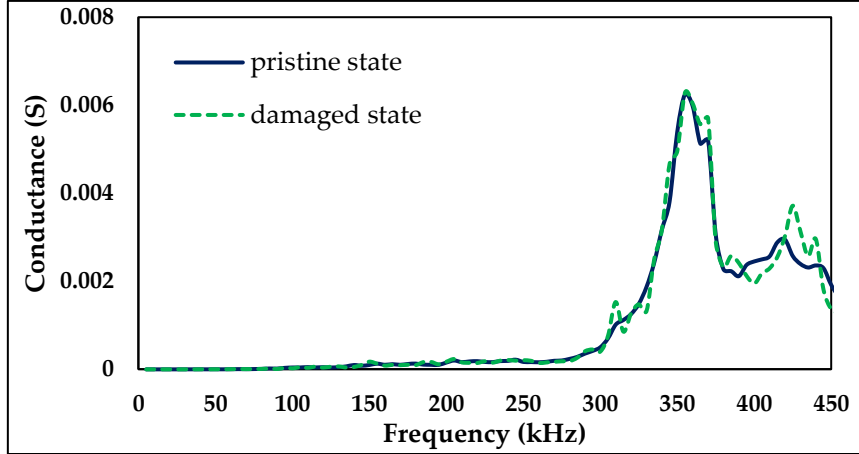

(b)

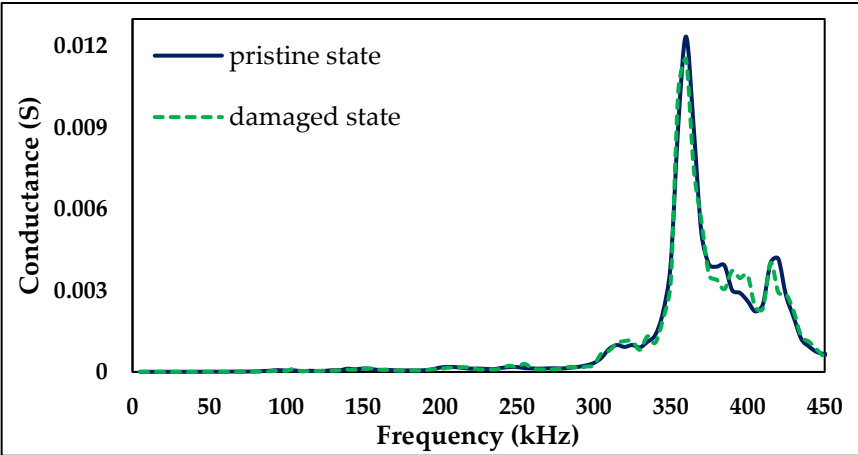

(c)

Conductance signatures obtained from (a) SSU-1; (b) SSU-2; (c) SSU-3 for the damaged concrete beam.

# Results

## Damage detection study

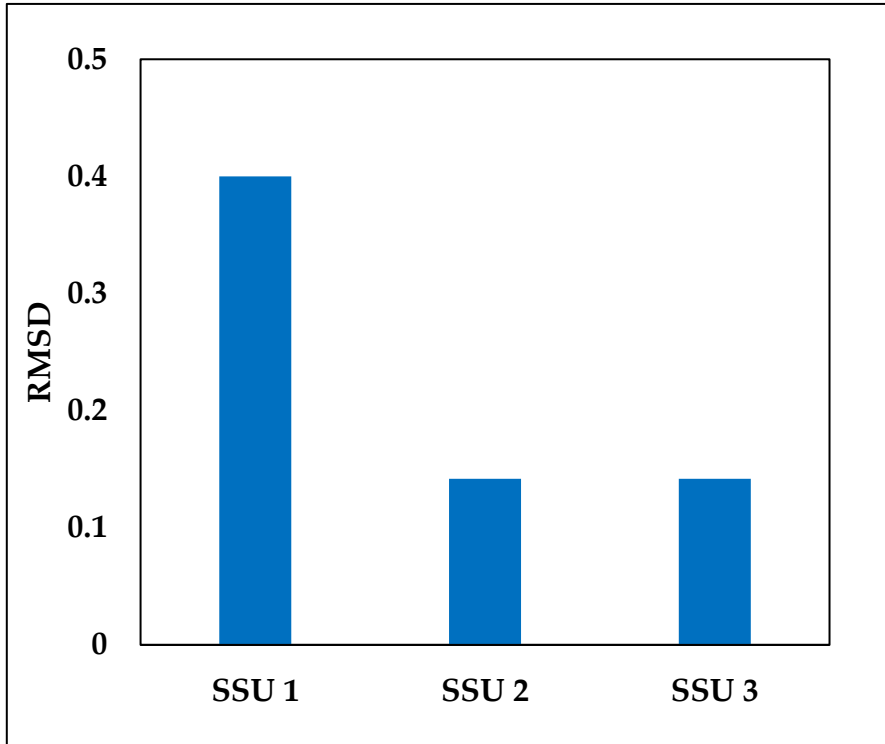

(a)

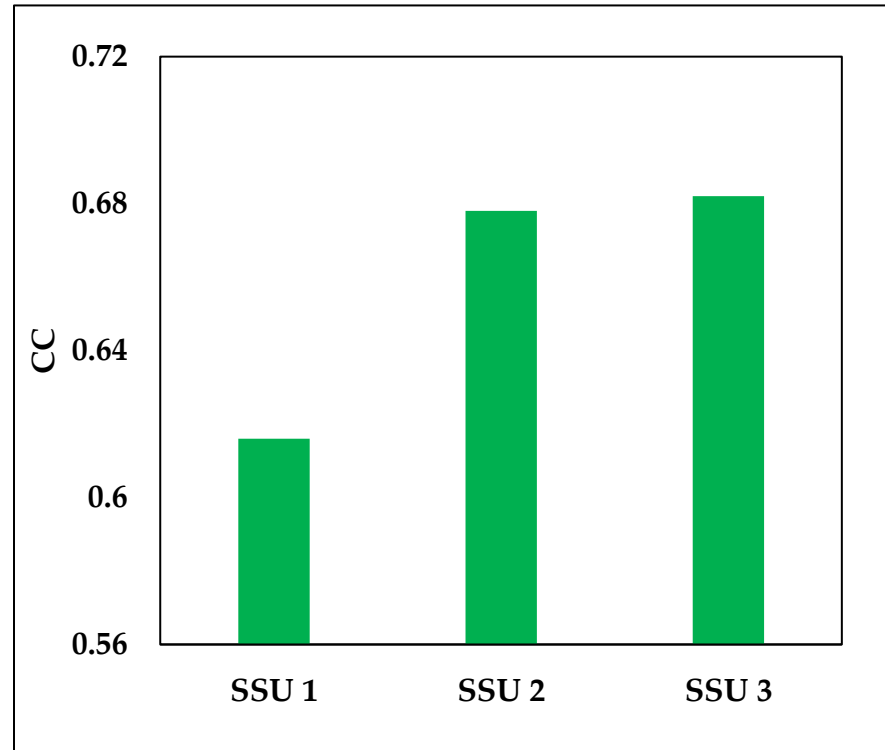

(b)

Various statistical metrics (a) RMSD; (b) CC evaluated for each SSU.



# Results

## Damage localization study

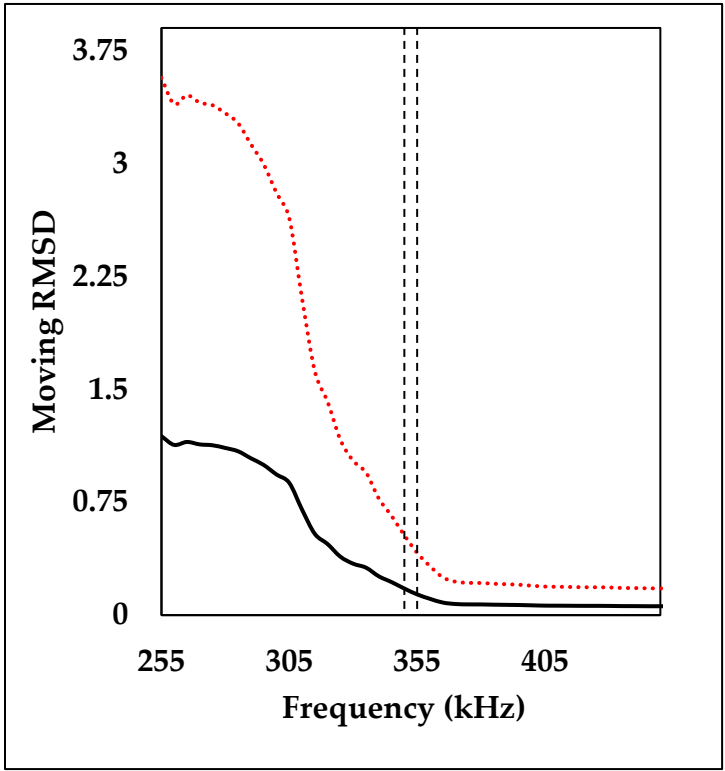

(a)

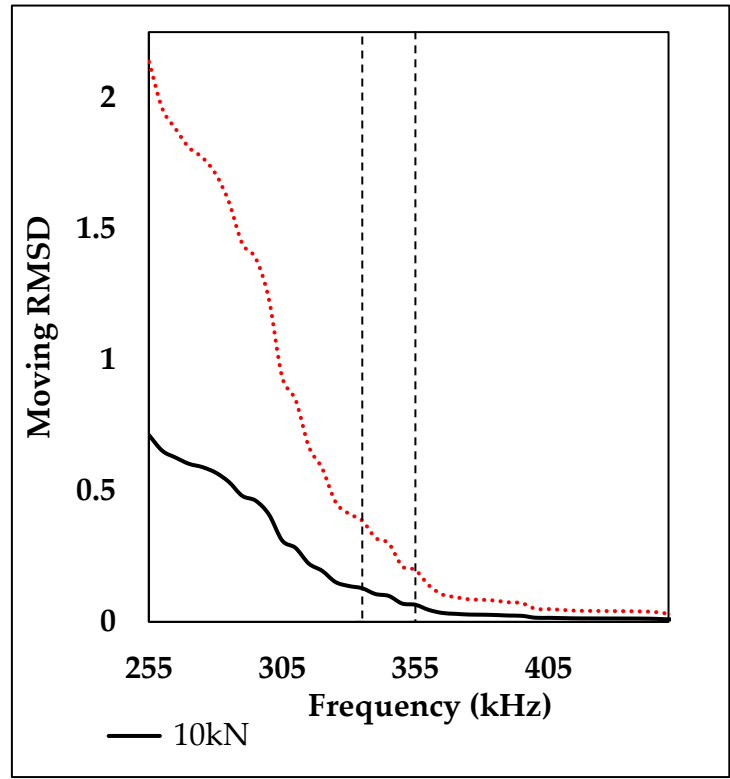

(b)

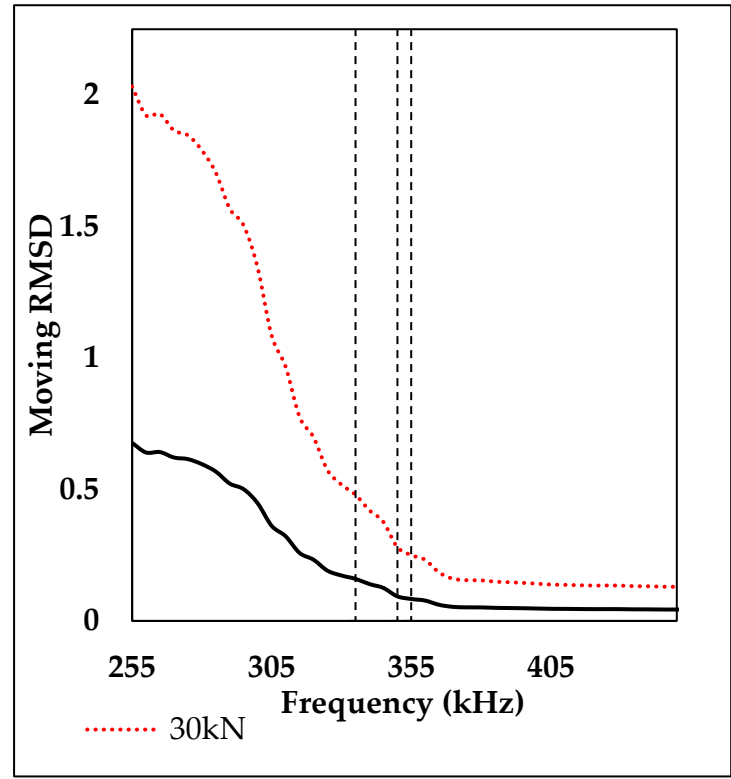

(c)

Moving RMSD plots for the combination (a) SSU 2-3; (b) SSU 1-3; (c) SSU 1-2-3 under different loading.

# Results

## Damage localization study

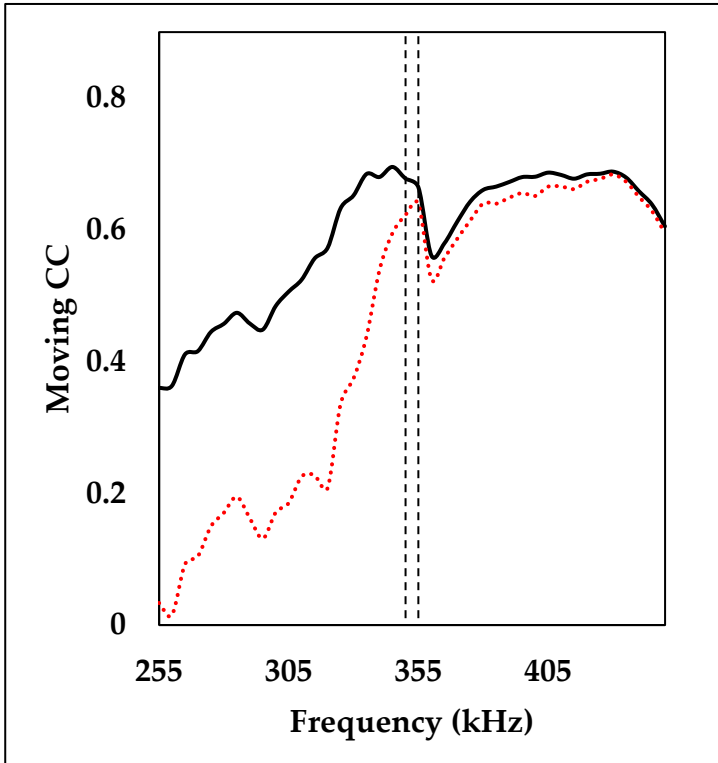

(a)

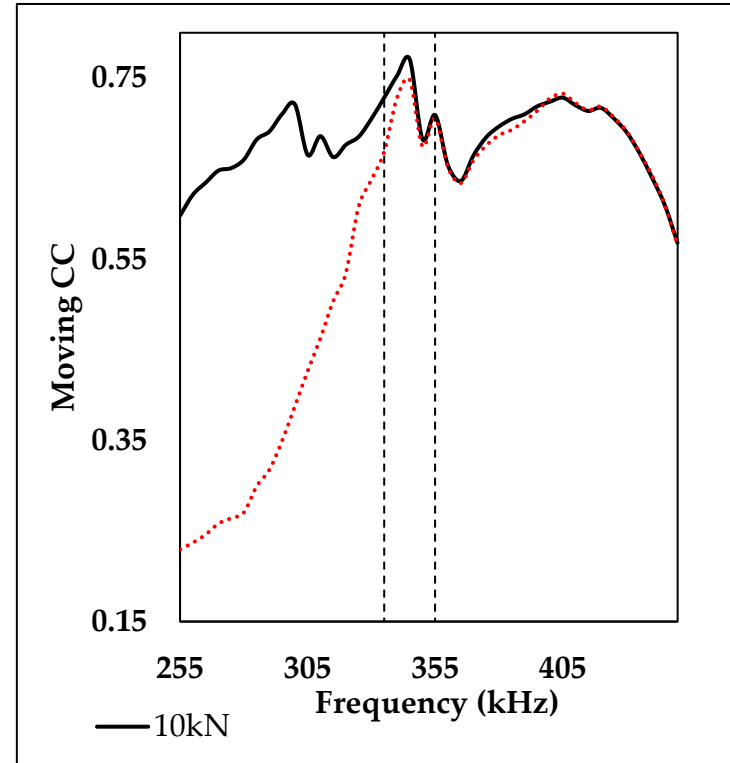

(b)

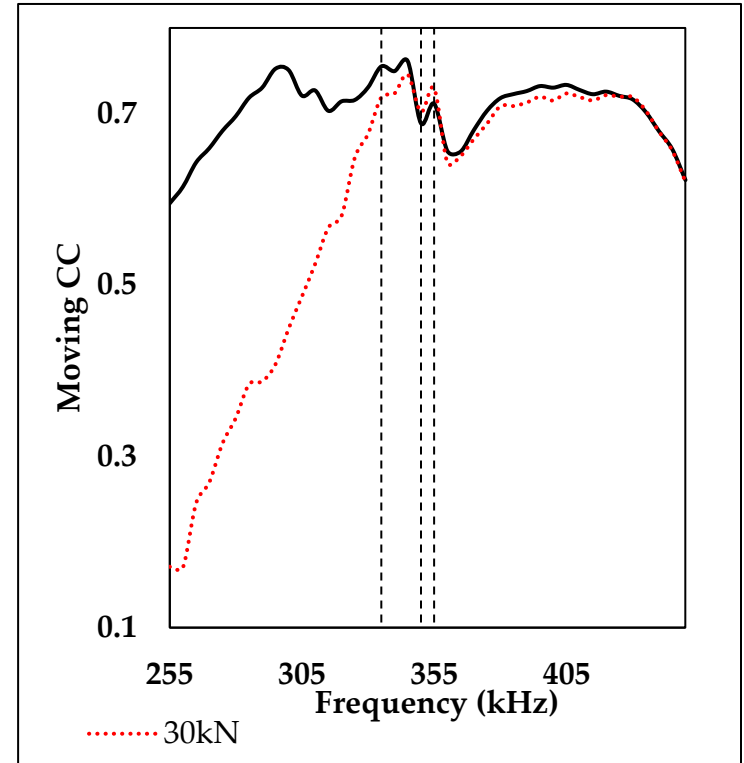

(c)

Moving CC plots for the combination (a) SSU 2-3; (b) SSU 1-3; (c) SSU 1-2-3 under different loading.

## Experimental validation

- Plain concrete beam: (100 x 200 x 2000) mm<sup>3</sup>
- Three similar type of PZT sensors
- Damage: crack induced at different location
  - ✓ Case I: 10 mm long crack
  - ✓ Case II: 28 mm long crack

| PZT No.                         | 1   | 2   | 3    |
|---------------------------------|-----|-----|------|
| Distance from first crack (mm)  | 75  | 580 | 1390 |
| Distance from second crack (mm) | 723 | 68  | 742  |

Concrete beam with multiple surface-mounted SSUs:  
Damage monitoring

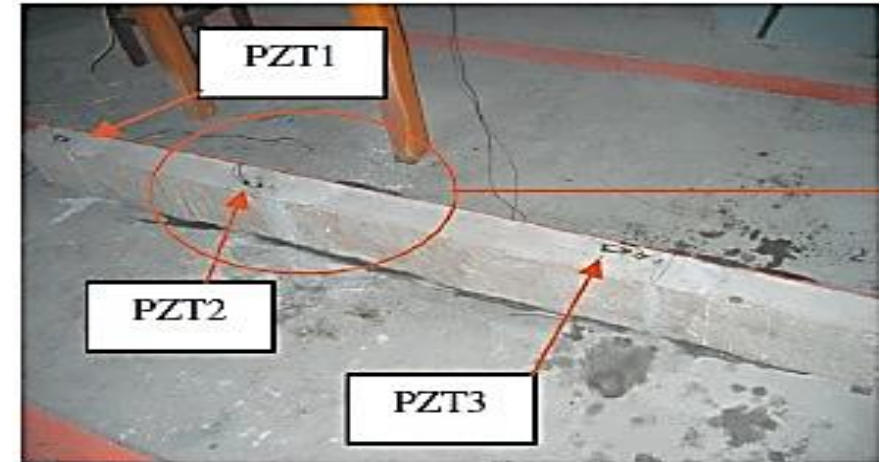

Wang, D. et al. 2013

# Experimental validation

## Damage detection study

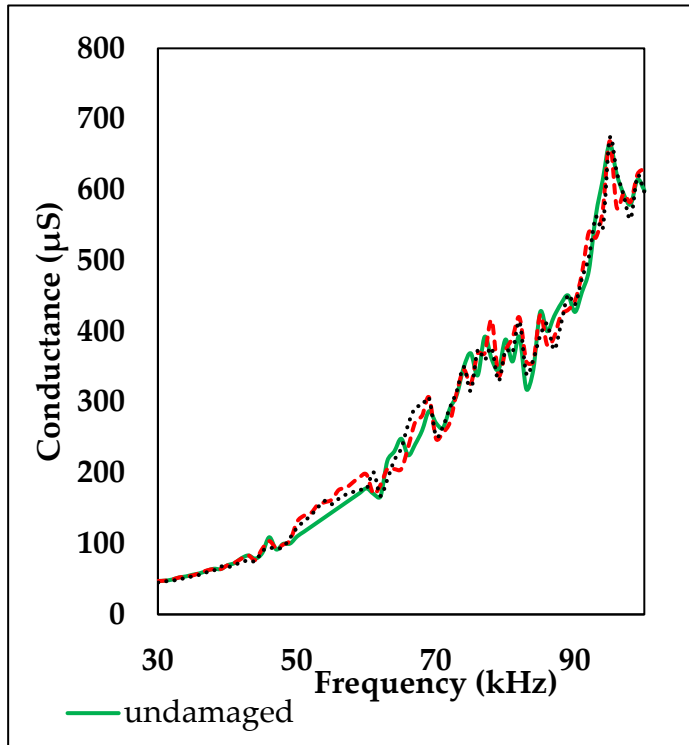

(a)

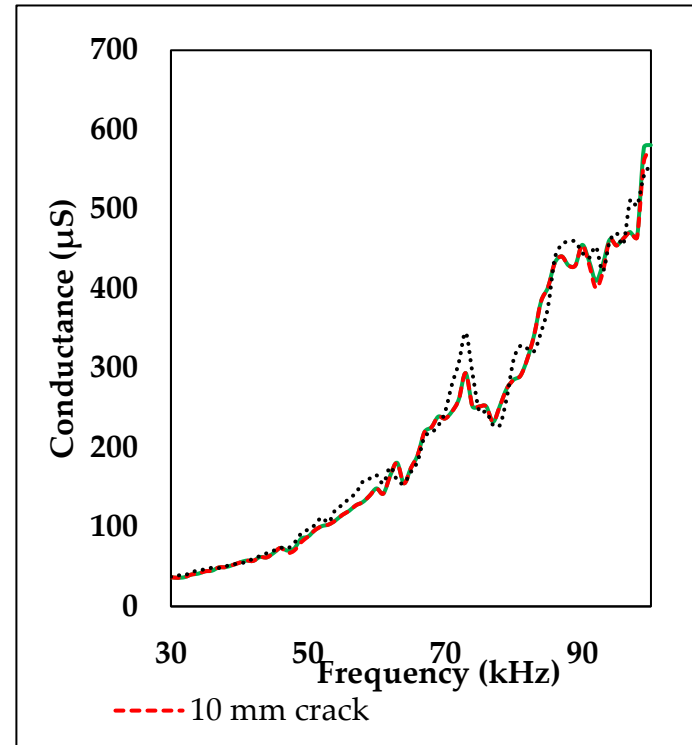

(b)

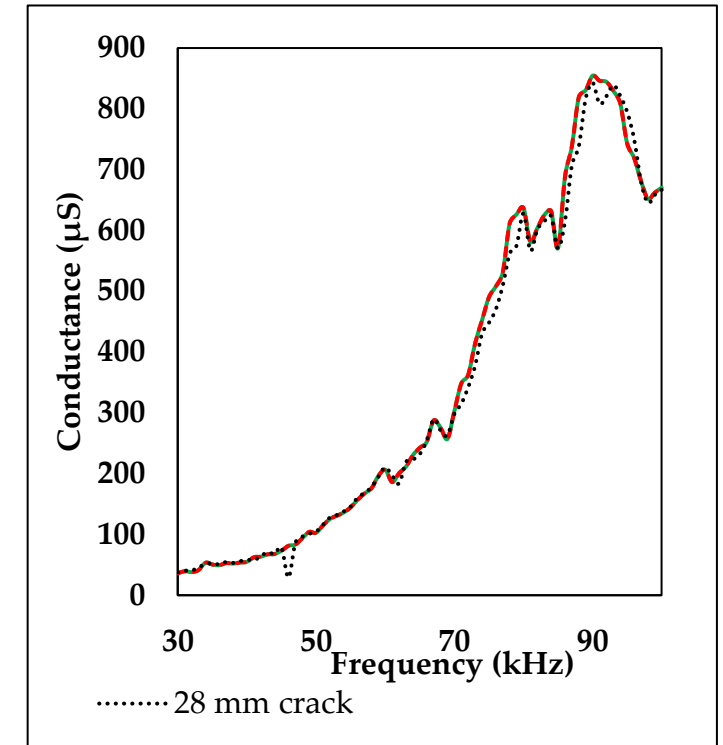

(c)

Conductance variations measured for (a) PZT-1; (b) PZT-2; (c) PZT-3 bonded to concrete beam.

# Experimental validation

## Damage detection study

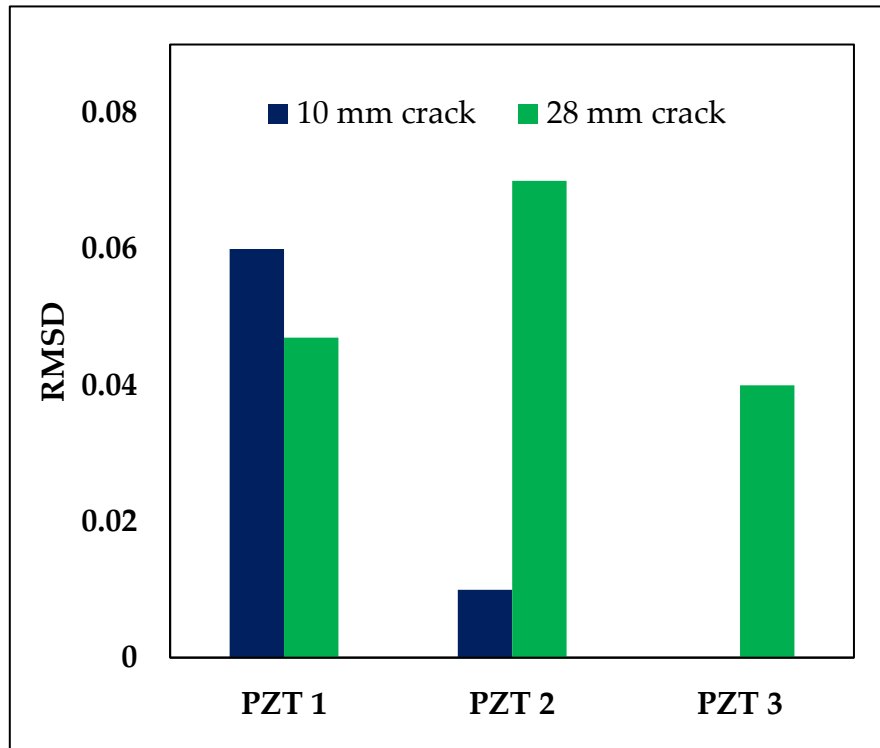

(a)

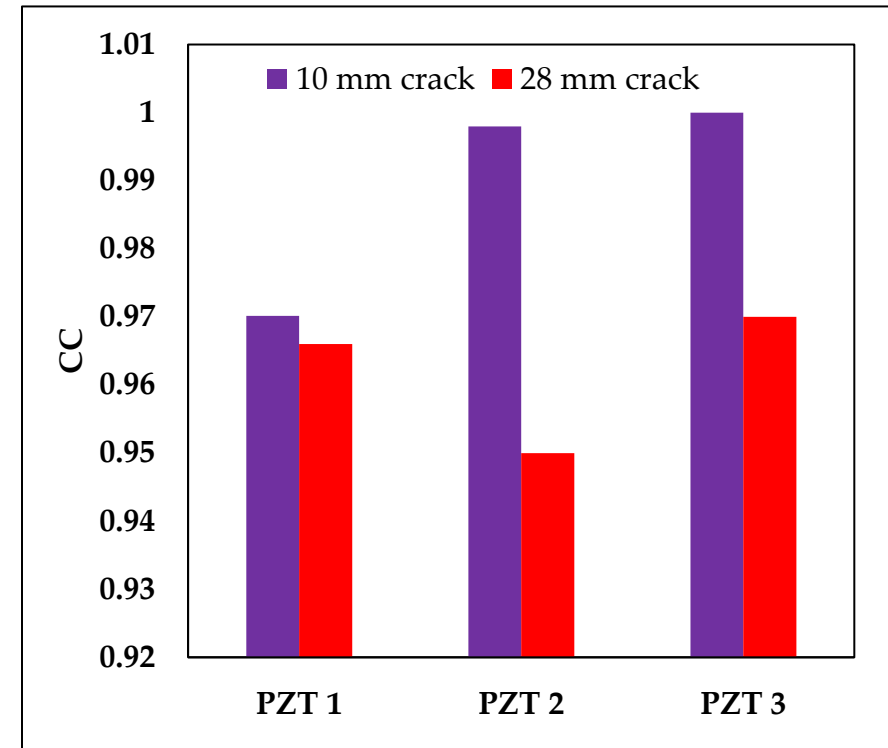

(b)

Statistical metrics (a) RMSD; (b) CC evaluated for various PZT sensors.

# Conclusion

- The trend of experimental results shows a good correlation with the numerical results.
- Surface-mounted SSUs are working well in the concrete structures.
- The proposal of the multi-sensing technique on the surface-mounted PZT sensors is recommended for effective SHM.
- The studies based upon damage detection and localization have been performed.

**Thank you for the kind attention.**

Any questions?  
ap35@iitbbs.ac.in
